# Supplementary material for: Is traditional male circumcision effective as an HIV prevention strategy? Evidence from Lesotho
Source: PubMed Central journal article supplement (PMC5428932; doi:10.1371/journal.pone.0177076), 2017-05-12
Supplement: pone.0177076.s001.pdf [file pone.0177076.s001.pdf]

## Supporting Information

**S1 Table. Male circumcision and risky sexual behavior.** Association between male circumcision and measures of risky sexual behavior.

S1 Table. Male circumcision and risky sexual behavior

| Dependent Variable:          | Age first marriage    | Age first intercourse | No condom last intercourse | Extramarital relationships | Sexually active last 4 weeks | Transactional sex     | Alcohol last sex      | No. people had sex last year | No. partners in lifetime |
|------------------------------|-----------------------|-----------------------|----------------------------|----------------------------|------------------------------|-----------------------|-----------------------|------------------------------|--------------------------|
|                              | (1)                   | (2)                   | (3)                        | (4)                        | (5)                          | (6)                   | (7)                   | (8)                          | (9)                      |
| Circumcised                  | 0.0101<br>(0.020)     | -0.0150<br>(0.016)    | 0.0817<br>(0.052)          | -0.0160<br>(0.065)         | 0.1182**<br>(0.052)          | -0.0076<br>(0.016)    | -0.0076<br>(0.030)    | 0.0585<br>(0.058)            | 0.1520<br>(0.143)        |
| Circumcised X TMC            | -0.0484**<br>(0.020)  | 0.0078<br>(0.016)     | -0.0029<br>(0.055)         | 0.1035<br>(0.068)          | -0.0993*<br>(0.054)          | 0.0115<br>(0.017)     | 0.0191<br>(0.032)     | 0.0805<br>(0.065)            | 0.0046<br>(0.152)        |
| Age                          | 0.0303***<br>(0.003)  | 0.0234***<br>(0.002)  | -0.0099<br>(0.008)         | -0.0053<br>(0.009)         | 0.0218***<br>(0.006)         | 0.0023<br>(0.002)     | 0.0120***<br>(0.003)  | 0.0165<br>(0.012)            | 0.0904***<br>(0.020)     |
| Age squared                  | -0.0003***<br>(0.000) | -0.0002***<br>(0.000) | 0.0002*<br>(0.000)         | 0.0000<br>(0.000)          | -0.0003***<br>(0.000)        | -0.0000<br>(0.000)    | -0.0001***<br>(0.000) | -0.0003**<br>(0.000)         | -0.0008***<br>(0.000)    |
| Educ secondary or higher     | 0.0230*<br>(0.012)    | 0.0049<br>(0.008)     | -0.1621***<br>(0.028)      | -0.0070<br>(0.036)         | 0.0117<br>(0.027)            | -0.0043<br>(0.007)    | 0.0005<br>(0.014)     | 0.1239***<br>(0.046)         | 0.2014**<br>(0.088)      |
| Rural area                   | -0.0186<br>(0.015)    | 0.0366***<br>(0.009)  | 0.0688**<br>(0.032)        | 0.0554<br>(0.040)          | -0.0605*<br>(0.032)          | -0.0063<br>(0.008)    | -0.0192<br>(0.017)    | 0.0026<br>(0.051)            | -0.1609*<br>(0.097)      |
| Married                      | 0.0092<br>(0.015)     | 0.0071<br>(0.010)     | 0.3014***<br>(0.029)       |                            | 0.4055***<br>(0.026)         | -0.0186***<br>(0.006) | -0.0260**<br>(0.012)  | 0.0797<br>(0.051)            | -0.0422<br>(0.094)       |
| Poor                         | 0.0208*<br>(0.012)    | -0.0021<br>(0.009)    | 0.1223***<br>(0.032)       | -0.0366<br>(0.035)         | -0.0127<br>(0.029)           | 0.0058<br>(0.007)     | 0.0155<br>(0.013)     | -0.0316<br>(0.036)           | -0.0443<br>(0.081)       |
| Self-employed in agriculture | -0.0058<br>(0.011)    | -0.0062<br>(0.008)    | 0.0243<br>(0.027)          | 0.0028<br>(0.028)          | -0.0327<br>(0.026)           | -0.0063<br>(0.006)    | 0.0052<br>(0.012)     | 0.0128<br>(0.043)            | -0.1373*<br>(0.077)      |
| Working yearly               | 0.0165*<br>(0.010)    | 0.0030<br>(0.008)     | 0.0520*<br>(0.027)         | 0.0890***<br>(0.028)       | 0.0211<br>(0.025)            | 0.0011<br>(0.006)     | -0.0104<br>(0.012)    | -0.0041<br>(0.034)           | 0.0114<br>(0.064)        |
| Household size               | -0.0023<br>(0.002)    | -0.0000<br>(0.001)    | 0.0109**<br>(0.004)        | -0.0144***<br>(0.005)      | 0.0006<br>(0.004)            | 0.0006<br>(0.001)     | -0.0007<br>(0.002)    | -0.0062<br>(0.005)           | -0.0106<br>(0.013)       |
| No. times away in past year  | -0.0004<br>(0.001)    | -0.0009<br>(0.001)    | 0.0011<br>(0.002)          | 0.0023<br>(0.002)          | 0.0010<br>(0.002)            | -0.0004<br>(0.001)    | 0.0009<br>(0.001)     | 0.0079**<br>(0.004)          | 0.0056<br>(0.006)        |
| Away in past month           | -0.0013<br>(0.011)    | 0.0087<br>(0.008)     | -0.0135<br>(0.028)         | -0.0236<br>(0.034)         | 0.0536*<br>(0.028)           | -0.0018<br>(0.007)    | -0.0141<br>(0.013)    | 0.0121<br>(0.039)            | -0.0000<br>(0.075)       |
| District FE                  | ✓                     | ✓                     | ✓                          | ✓                          | ✓                            | ✓                     | ✓                     | ✓                            | ✓                        |
| Religion controls            | ✓                     | ✓                     | ✓                          | ✓                          | ✓                            | ✓                     | ✓                     | ✓                            | ✓                        |
| Model                        | Poisson               | Poisson               | Logit (ME)                 | Logit (ME)                 | Logit (ME)                   | Logit (ME)            | Logit (ME)            | Poisson                      | Poisson                  |
| Mean Dep Var                 | 23.76                 | 17.71                 | 0.440                      | 0.293                      | 0.508                        | 0.0269                | 0.0927                | 1.185                        | 7.771                    |
| Observations                 | 1,469                 | 2,711                 | 2,341                      | 1,282                      | 2,672                        | 2,640                 | 2,662                 | 2,672                        | 2,575                    |

\*\*\* p<0.01, \*\* p<0.05, \* p<0.1. Standard errors in parentheses. The main specification is an Ordinary Least Square (OLS). Religion controls include dummies for whether the respondent is Catholic, Protestant or Islamic. District fixed effects are also included. Standard errors are clustered at the smallest enumeration area.
